# Supplementary material
Source: Research Square preprint supplement (doi:10.21203/rs.3.rs-9611737/v1)
Supplement: Supplementary file 1 [file ca44a92f98972ffc2cea7cc9.docx]

The influence of climate variability on global storm surges

Ayoola Apolola1, Philip J. Ward1,2, Fernando J. Méndez3, Victor Collado4, Timothy Tiggeloven1,5, Wiebke Jäger1, José A. Á. Antolínez6, Sanne Muis1,2

1 Institute for Environmental Studies (IVM), Vrije Universiteit Amsterdam, Amsterdam, The Netherlands.

2 Deltares, Delft, The Netherlands.

3 Geomatics and Ocean Engineering Group (GEO-OCEAN), department of Water and Environmental Science and Engineering, university of Cantabria, Santander, Spain.

4  Department of Statistics, Universidad Carlos III de Madrid, Leganés, Spain.

5 CMCC Foundation - Euro-Mediterranean Center on Climate Change, Venice, Italy.

6 Department of Hydraulic Engineering, Faculty of Civil Engineering and Geosciences, Delft University of Technology, The Netherlands

**Contents of this file**

Figures S1 to S5 and Table S1





**Figure S1**: Decadal variability between pre-satellite years (panels a, e and i) and more recent years (panels b -d, f-h, and j-l). This is calculated as the relative difference in decadal standard deviations.

**Table S1:** Years categorized into phases of ENSO and NAO

| **Climate mode** | ENSO | | | NAO | | |
| --- | --- | --- | --- | --- | --- | --- |
| El Nino | La Nina | Neutral | Positive | Negative | Neutral |
| **Years** | 1951 | 1950 | 1952, 1959 | 1950 | 1955 | 1951, 1952 |
| 1953 | 1954 | 1960, 1961 | 1954 | 1968 | 1953, 1956 |
| 1957 | 1955 | 1962, 1966 | 1959 | 1969 | 1957, 1958 |
| 1958 | 1956 | 1967, 1968 | 1961 | 1971 | 1960, 1962 |
| 1963 | 1964 | 1976, 1977 | 1967 | 1985 | 1963, 1964 |
| 1965 | 1970 | 1978, 1979 | 1974 | 1987 | 1965, 1966 |
| 1969 | 1971 | 1980 | 1982 | 1995 | 1970, 1972 |
| 1972 | 1973 | 1981 | 1986 | 1996 | 1973, 1975 |
| 1982 | 1974 | 1984 | 1989 | 2001 | 1976, 1977 |
| 1983 | 1975 | 1986 | 1990 | 2008 | 1978, 1979 |
| 1987 | 1985 | 1990 | 1992 | 2010 | 1980, 1981 |
| 1991 | 1988 | 1993 | 1994 | 2012 | 1983, 1984 |
| 1992 | 1989 | 1994 | 2011 | 2021 | 1988, 1991 |
| 1997 | 1995 | 1996 | 2013 | 2023 | 1993, 1997 |
| 2002 | 1998 | 2001 | 2015 |  | 1998, 1999 |
| 2004 | 1999 | 2003 | 2017 |  | 2000, 2002 |
| 2009 | 2000 | 2005 | 2018 |  | 2003,2004 |
| 2015 | 2007 | 2006 |  |  | 2005, 2006 |
| 2019 | 2008 | 2012 |  |  | 2007 |
| 2023 | 2010 | 2013 |  |  | 2009 |
|  | 2011 | 2014 |  |  | 2014 |
|  | 2016 | 2017 |  |  | 2016 |
|  | 2020 | 2018 |  |  | 2019 |
|  | 2022 | 2021 |  |  | 2020 |
|  |  | 2024 |  |  | 2022 |
|  |  |  |  |  | 2024 |
| **Total Number of years** | **20** | **24** | **31** | **17** | **14** | **44** |


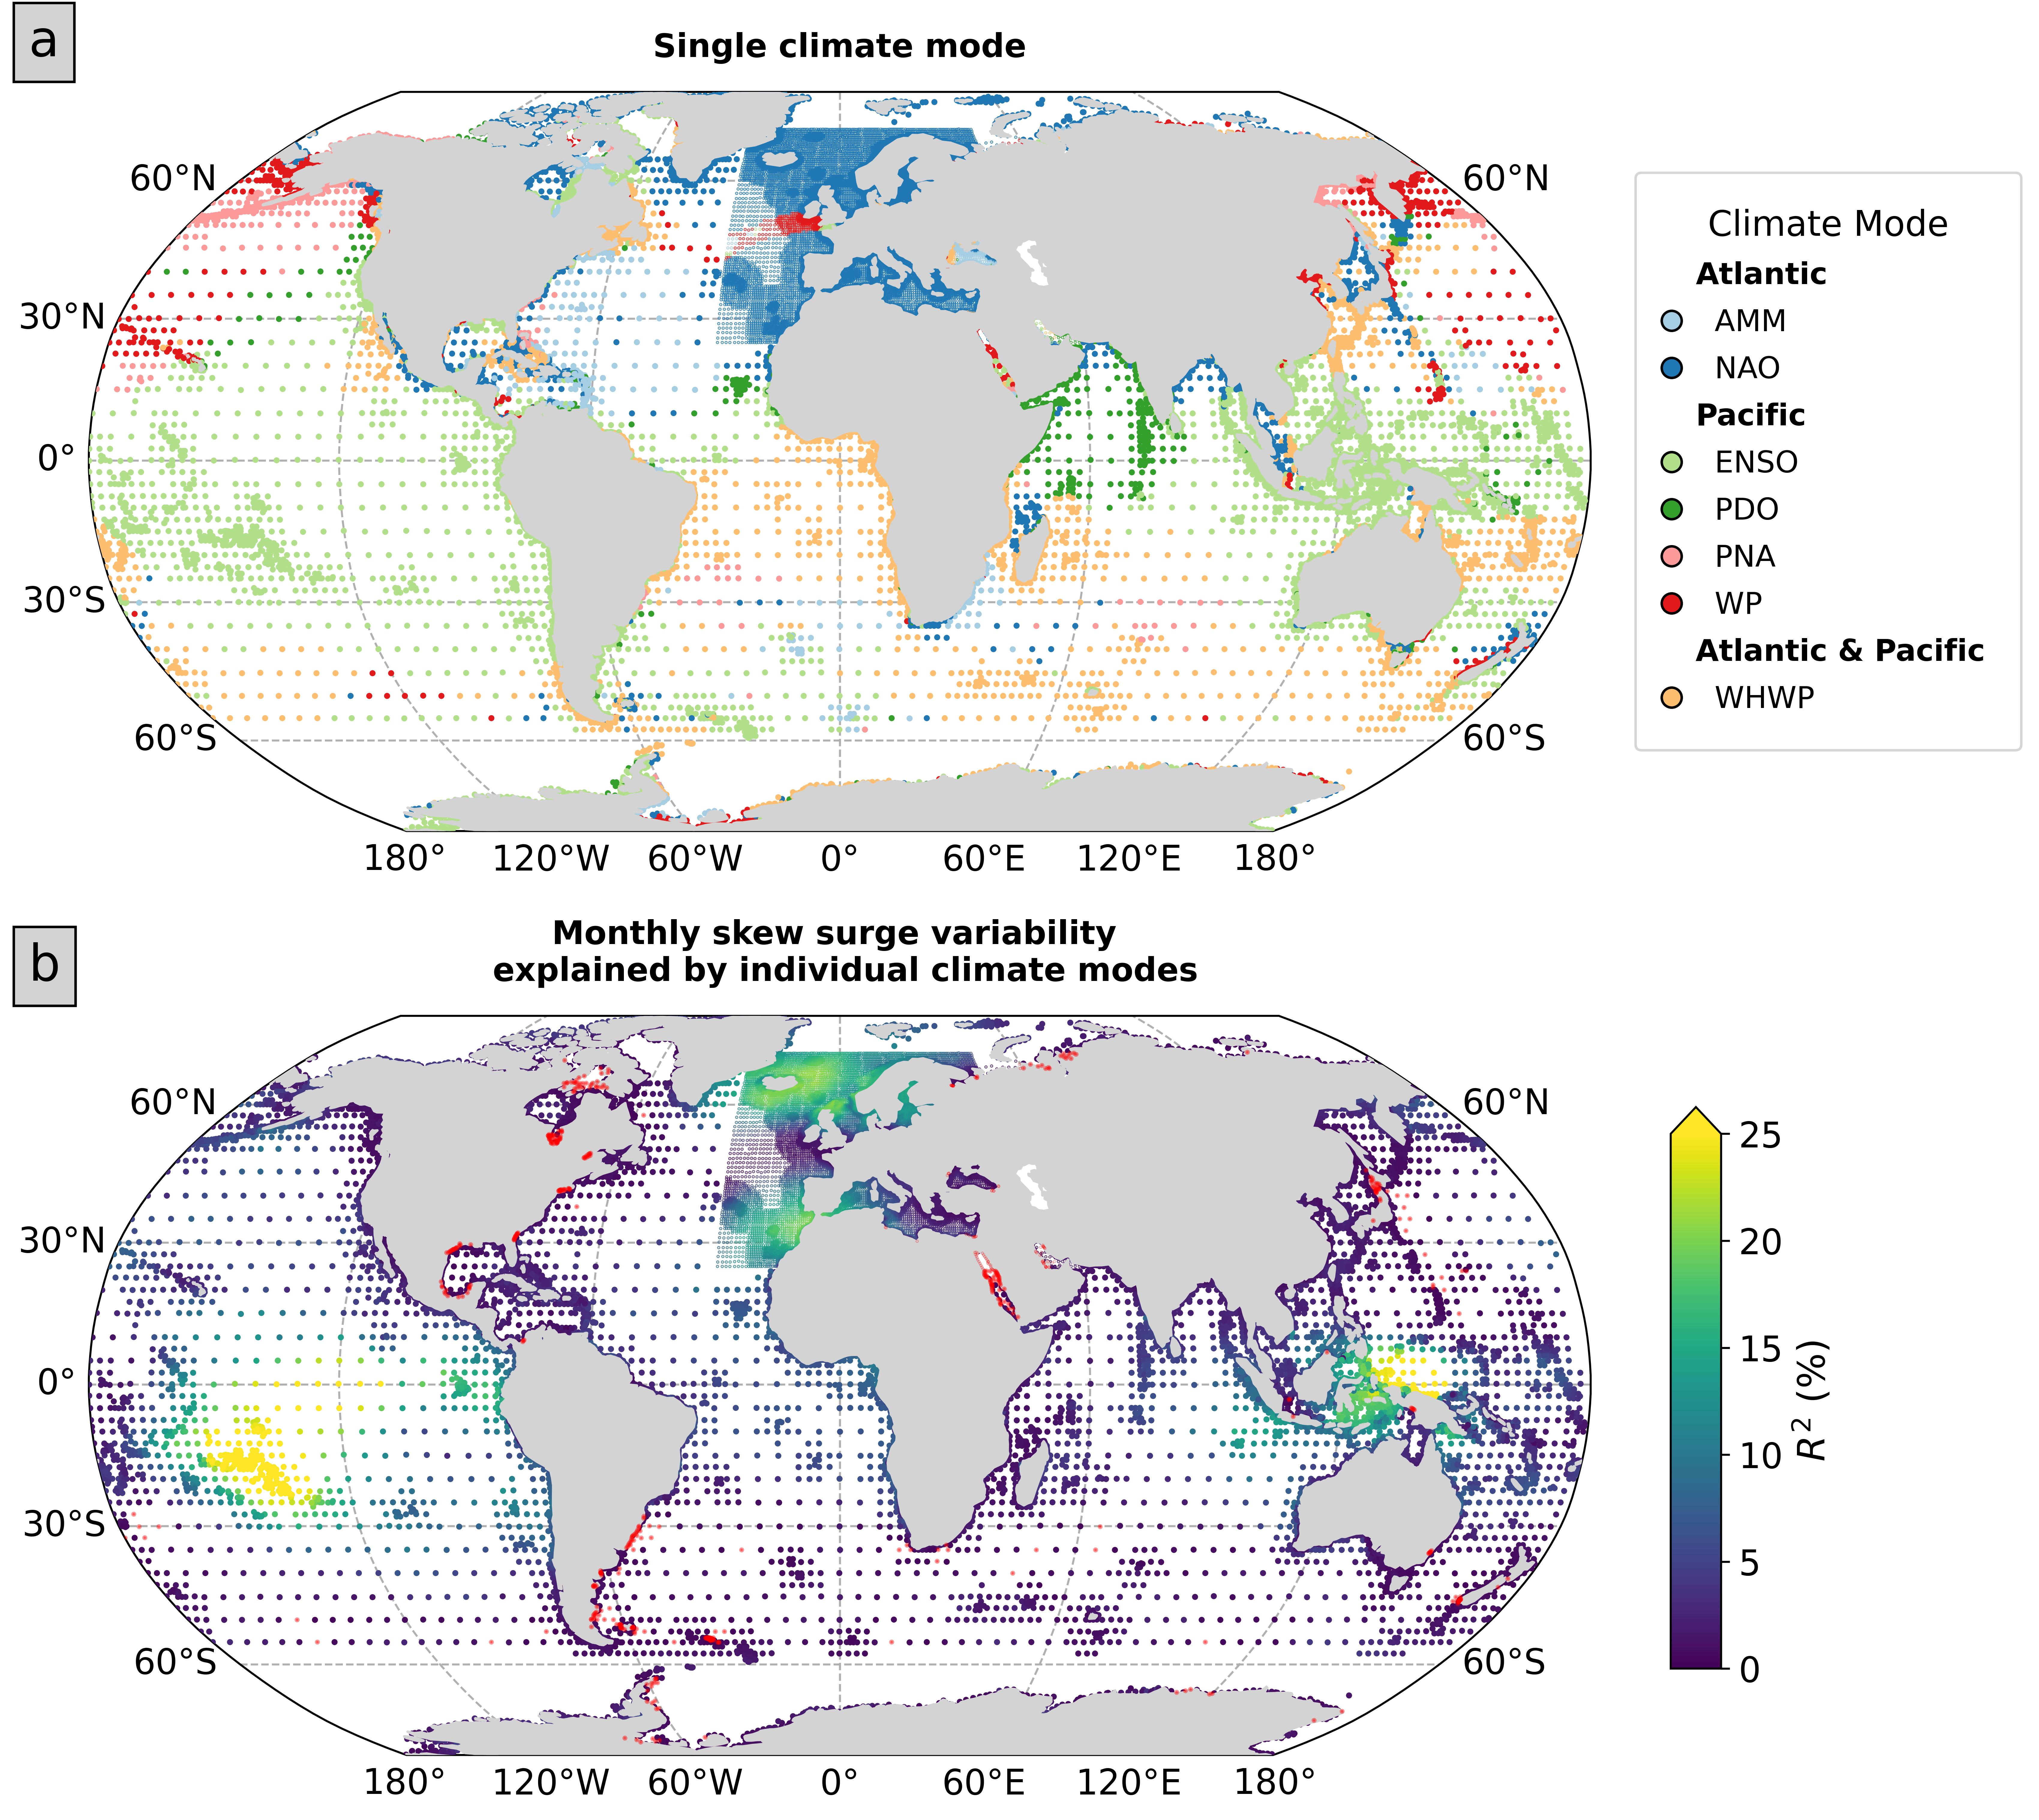


**Figure S2:** Global maps showing a) the most statistically significant climate mode at each output station, and b) the strength of the relationship with extreme surge height.





**Figure S3:** Global plots showing the sensitivity of extreme surge height in the location parameter to the standardised coefficient of a) AMM, b) NAO, c) ENSO, d) PDO, e) PNA, f) WP, g) WHWP. Output stations indicated in black indicate no statistically significant relationships at the 95% confidence level.





**Figure S4:** Global plots showing the sensitivity of extreme surge height in the scale parameter to the standardised coefficient of a) AMM, b) NAO, c) ENSO, d) PDO, e) PNA, f) WP, g) WHWP. Output stations indicated in black indicate no statistically significant relationships at the 95% confidence level.





**Figure S5:** 100-year surge level estimate for the neutral ENSO and NAO phase (panels a, c and e) and the absolute difference in surge level for La Niña in Southeast Asia and Australia (panels b) and El Niño in the United States and Central America (panel d). Panel f shows the absolute difference for the positive and negative NAO phases across Europe and the Mediterranean. Bootstrapping was used to assess the statistical significance of the phase difference, and stations shown in black indicate where the phase difference is not statistically significant.





**Figure S6:** 100-year surge level estimate for the neutral ENSO and NAO phase (panels a, c and e) and the relative difference in surge level for La Niña in Southeast Asia and Australia (panels b) and El Niño in the United States and Central America (panel d). Panel f shows the relative difference for the positive and negative NAO phases across Europe and the Mediterranean. Bootstrapping was used to assess the statistical significance of the phase difference, and stations shown in black indicate where the phase difference is not statistically significant.
